# Supplementary material
Source: publisher figshare collection journal article supplement (https://acs.figshare.com/ndownloader/files/11778953)
Supplement: Supplementary file 1 [file 11778953]

Supporting Information for

# **Energy-Efficient Electrochemical Strategy for the Oxidative Sequestration of As(III) in Synthesized Anoxic Groundwater**

Bo Jiang<sup>†,‡,\*</sup>, Shuaishuai Xin<sup>†</sup>, Yijie Liu<sup>†</sup>, Congcong Nin<sup>†</sup>, Xuejun Bi<sup>†</sup>, Jianliang

Xue<sup>§</sup>,

<sup>†</sup> *School of Environmental and Municipal Engineering, Qingdao University of Technology, Qingdao 266033, PR China;*

<sup>‡</sup> *State Key Laboratory of Petroleum Pollution Control, CNPC Research Institute of Safety and Environmental Technology, Beijing, 102206, China*

<sup>§</sup> *College of Chemical and Environmental Engineering, Shandong University of Science and Technology, Qingdao 266590, PR China*

\*Corresponding author: [bjiang86upc@163.com](mailto:bjiang86upc@163.com)

**Fig. S1.**

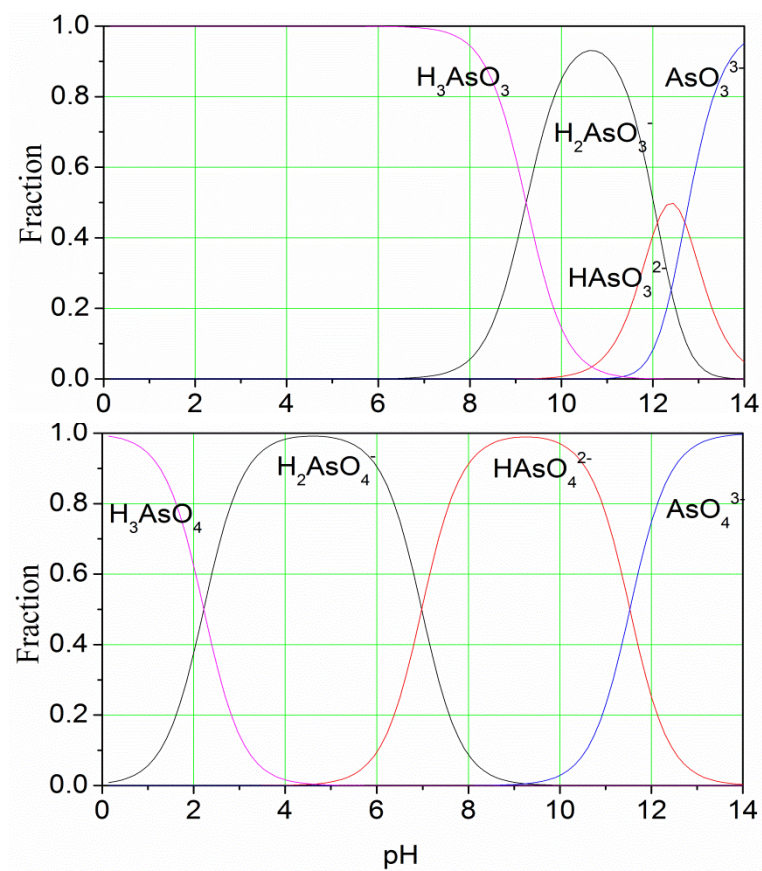

**Fig. S1.** The speciation distributions of As(III) and As(V) in the pH range of 1-12.0.

**Fig. S2.**

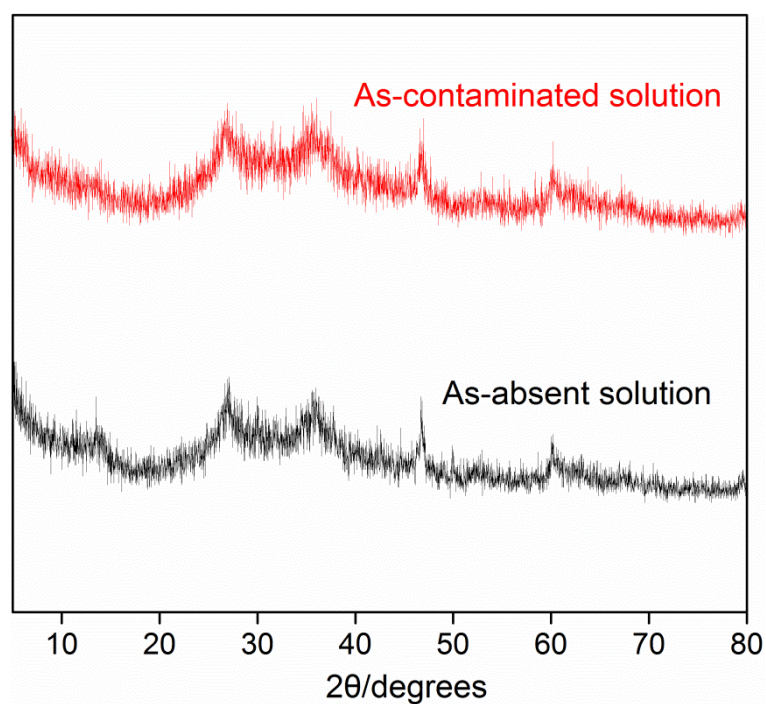

**Fig. S2.** XRD patterns obtained for the precipitants from the As-contaminated solution and As-absent solution in the RAC electrocoagulation system.
